# Supplementary material for: The association of Helicobacter pylori infection with serum lipid profiles: An evaluation based on a combination of meta-analysis and a propensity score-based observational approach
Source: PLoS One. 2020 Jun 8;15(6):e0234433. doi: 10.1371/journal.pone.0234433 (PMC7279579; doi:10.1371/journal.pone.0234433)
Supplement: S5 Table — (XLSX) [file pone.0234433.s005.xlsx]

## Sheet: Supplemental Table S4
Table S5. A summary of the characteristics of cohort and case-control studies excluded in a meta-analysis, which was performed to compare the association of Helicobacter pylori to lipid profile
Study	Study population	Study period	Study design	Serum lipid profile (Units)	Sample size		a unit of measure for lipid profile		H. pylori infection antibody test	Outcomes
					positive	negative	positive	negative
Laurila A. 1999 [1]	Finland	1985-1989	Case-Control	HDL-C (mmol/l) TC (mmol/l) TG (mmol/l)	both IgG and IgA 460 IgG 113 IgA 38	269	both IgG and IgA HDL-C mean; 0.19 TC mean; 1.22 TG mean; 1.17	mean; 0.21 mean; 1.24 mean; 1.00	Pyloriset, Orion Diagnostica, Espoo	Lipid levels
Hoffmeister A. 2001 [2]	Germany	Not specified	Case-Control	HDL-C (mmol/l) TC (mmol/l)	CHD patients 90 Healthy Subjects 156	148 313	CHD patients HDL-C mean; 1.16 TC mean; 5.26 Healthy Subjects HDL-C mean; 1.36 TC mean; 5.38	mean; 1.12 mean; 5.20 mean; 1.44 mean; 5.32	[13C]urea breath test	Coronary heart disease
Kinjo K. 2002 [3]	Japan	April 1999 - March 2000	Case-Control	HDL-C (mg/dL) TC (mg/dL)	Cases 371 Controls 558	247 409	Cases HDL-C mean; 47 TC mean; 230 Controls HDL-C mean; 62 TC mean; 212	mean; 46 mean; 208 mean; 64 mean; 212	ELISA	acute myocardial infarction (AMI)
Volanen I. 2005 [4]	Finland	1990-1992	Case-Control	HDL-C (mmol/l) TC (mmol/l)			HDL-C mean (95%CI); 1.22 (0.95-1.49) TC mean (95%CI); 3.78 (3.35-4.21)	mean (95%CI); 1.29 (1.24-1.33) mean (95%CI); 4.48 (4.37-4.59)	EIA	Lipid levels
Yamamoto R. 2012 [5]	Japan	1999	Case-Control	HDL-C (mg/dL) TC (mg/dL)	Not described	Not described	Not described	Not described	ELISA	hypertension
HDL-C, high-density lipoprotein cholesterol; LDL-C, low-density lipoprotein cholesterol; TC, total cholesterol; TG, triglyceride.
